# Supplementary material for: A wild ‘albino’ bilberry (Vaccinium myrtillus L.) from Slovenia shows three bottlenecks in the anthocyanin pathway and significant differences in the expression of several regulatory genes compared to the common blue berry type
Source: PubMed Central journal article supplement (PMC5741254; doi:10.1371/journal.pone.0190246), 2017-12-22
Supplement: pone.0190246.s001.pdf [file pone.0190246.s001.pdf]

**S1 Table.** Optimized conditions for assays of main enzymes in the flavonoid pathway of bilberry.

| Enzyme   | Crude extract (μl) | Buffer                                      | (μl) | Substrate                                                                   | (μl)   | Cofactor                                                                                                             | (μl)   | Final volume (μl) | Stop reaction (μl)  |
|----------|--------------------|---------------------------------------------|------|-----------------------------------------------------------------------------|--------|----------------------------------------------------------------------------------------------------------------------|--------|-------------------|---------------------|
| PAL      | 40                 | 0.1 M KPi + 0.4% Na-ascorbate, pH 8.5       | 55   | <sup>14</sup> C)-phenylalanine (0.063 nmol)                                 | 5      | -                                                                                                                    |        | 100               | 200 EE*<br>10 HAC** |
| CHS/ CHI | 40                 | 0.1 M KPi + 0.4% Na-ascorbate, pH 7.5       | 50   | <sup>14</sup> C)-malonyl-CoA (1.5 nmol)<br><i>p</i> -coumaroyl-CoA (1 nmol) | 5<br>5 | -                                                                                                                    |        | 100               | 200 EE<br>10 HAC    |
| FHT      | 30                 | 0.1 M Tris/HCl + 0.4 % Na-ascorbate, pH 7.5 | 60   | <sup>14</sup> C)-naringenin (0.036 nmol)                                    | -      | 2-oxoglutarate (1.46 mg/ml H <sub>2</sub> O)<br>FeSO <sub>4</sub> × 7 H <sub>2</sub> O (0.56 mg/ml H <sub>2</sub> O) | 5<br>5 | 100               | 70 EE<br>10 HAC     |
| DFR      | 20                 | 0.1 M KPi + 0.4% Na-ascorbate, pH 6.5       | 25   | <sup>14</sup> C)-DHM/<br>DHQ/<br>DHK (0.036 nmol)                           | -      | NADPH (4.18 mg/100 μl H <sub>2</sub> O)                                                                              | 5      | 50                | 70 EE               |

\*EE ethyl acetate

\*\*HAC acetic acid
