# Supplementary material for: A wild ‘albino’ bilberry (Vaccinium myrtillus L.) from Slovenia shows three bottlenecks in the anthocyanin pathway and significant differences in the expression of several regulatory genes compared to the common blue berry type
Source: PubMed Central journal article supplement (PMC5741254; doi:10.1371/journal.pone.0190246), 2017-12-22
Supplement: pone.0190246.s005.pdf [file pone.0190246.s005.pdf]

**S5 Table.** Content levels of total anthocyanins, flavanols, flavonols, hydroxycinnamic acid derivatives, hydroxybenzoic acid derivative and total phenolic content (mg kg<sup>-1</sup> FW) of blue and albino bilberry skins.

|                                               | <b>Blue bilberry</b>  | <b>Albino bilberry</b> |
|-----------------------------------------------|-----------------------|------------------------|
| Delphinidin-3- <i>O</i> -galactoside          | 1092.4 ± 100.7 a      | 9.23 ± 2.33 b          |
| Cyanidin-3- <i>O</i> -glucoside               | 931.6 ± 6.12 a        | 2.98 ± 0.69 b          |
| Cyanidin-3- <i>O</i> -arabinoside             | 800.3 ± 58.5 a        | 7.38 ± 1.67 b          |
| Delphinidin-3- <i>O</i> -arabinoside          | 770.8 ± 41.1 a        | 6.42 ± 14.7 b          |
| Petunidin-3- <i>O</i> -glucoside              | 694.6 ± 50.6 a        | 6.38 ± 1.44 b          |
| Cyanidin-3- <i>O</i> -galactoside             | 617.0 ± 32.9 a        | 5.15 ± 1.18 b          |
| Delphinidin-3- <i>O</i> -glucoside            | 576.0 ± 49.7 a        | 1.16 ± 0.34 b          |
| Petunidin-3- <i>O</i> -galactoside            | 477.6 ± 44.4 a        | 1.52 ± 0.36 b          |
| Malvidin-3- <i>O</i> -glucoside               | 366.2 ± 47.7 a        | 1.06 ± 0.39 b          |
| Peonidin-3- <i>O</i> -glucoside               | 288.0 ± 51.1 a        | 0.46 ± 0.15 b          |
| Malvidin-3- <i>O</i> -galactoside             | 274.8 ± 48.7 a        | 0.46 ± 0.15 b          |
| Petunidin-3- <i>O</i> -arabinoside            | 170.8 ± 20.7 a        | 3.64 ± 1.59 b          |
| Malvidin-3- <i>O</i> -arabinoside             | 86.6 ± 10.5 a         | 1.02 ± 0.29 b          |
| Peonidin-3- <i>O</i> -galactoside             | 42.6 ± 5.16 a         | 0.90 ± 0.39 b          |
| Peonidin-3- <i>O</i> -arabinoside             | 25.4 ± 3.39 a         | 0.08 ± 0.04 b          |
| <b>Total anthocyanins</b>                     | <b>7218 ± 183 a</b>   | <b>47.85 ± 11.3 b</b>  |
| <b>Total flavanols</b>                        | <b>397.4 ± 61.2 a</b> | <b>225.5 ± 36.8 b</b>  |
| <b>Total flavonols</b>                        | <b>473.1 ± 34.5 a</b> | <b>133.3 ± 38.4 b</b>  |
| <b>Total hydroxycinnamic acid derivatives</b> | <b>1961 ± 82.0 a</b>  | <b>645.4 ± 128 b</b>   |
| <b>Hydroxybenzoic acid derivative</b>         | <b>3.48 ± 0.29 ns</b> | <b>2.74 ± 0.26 ns</b>  |
| <b>Total phenolic content</b>                 | <b>10995 ± 376 a</b>  | <b>1603 ± 189 b</b>    |

Mean and standard errors are presented. Different letters (a–b) in rows denote statistically significant differences between the forms at  $P < 0.05$  (LSD test).
